# Supplementary material for: Development of a patient-derived xenograft model of glioblastoma via intravitreal injection in mice
Source: Exp Mol Med. 2019 Apr 16;51(4):43. doi: 10.1038/s12276-019-0241-3 (PMC6467997; doi:10.1038/s12276-019-0241-3)
Supplement: Supplementary file 1 — Supplementary Information [file 12276_2019_241_MOESM1_ESM.pdf]

## **Supplementary Information**

### **Development of a patient-derived xenograft model of glioblastoma via intravitreal injection in mice**

**Supplementary Figure 1.**

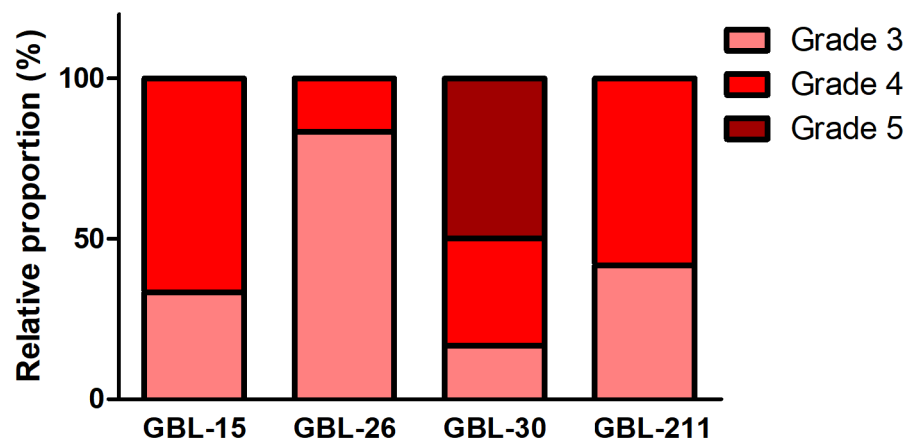

The relative proportion of mice with grade 3, 4, and 5 tumors after intravitreal injection of additional 4 patient-derived glioblastoma cell lines which underwent hypoxia treatment for 4 hours before injection.

**Supplementary Figure 2.**

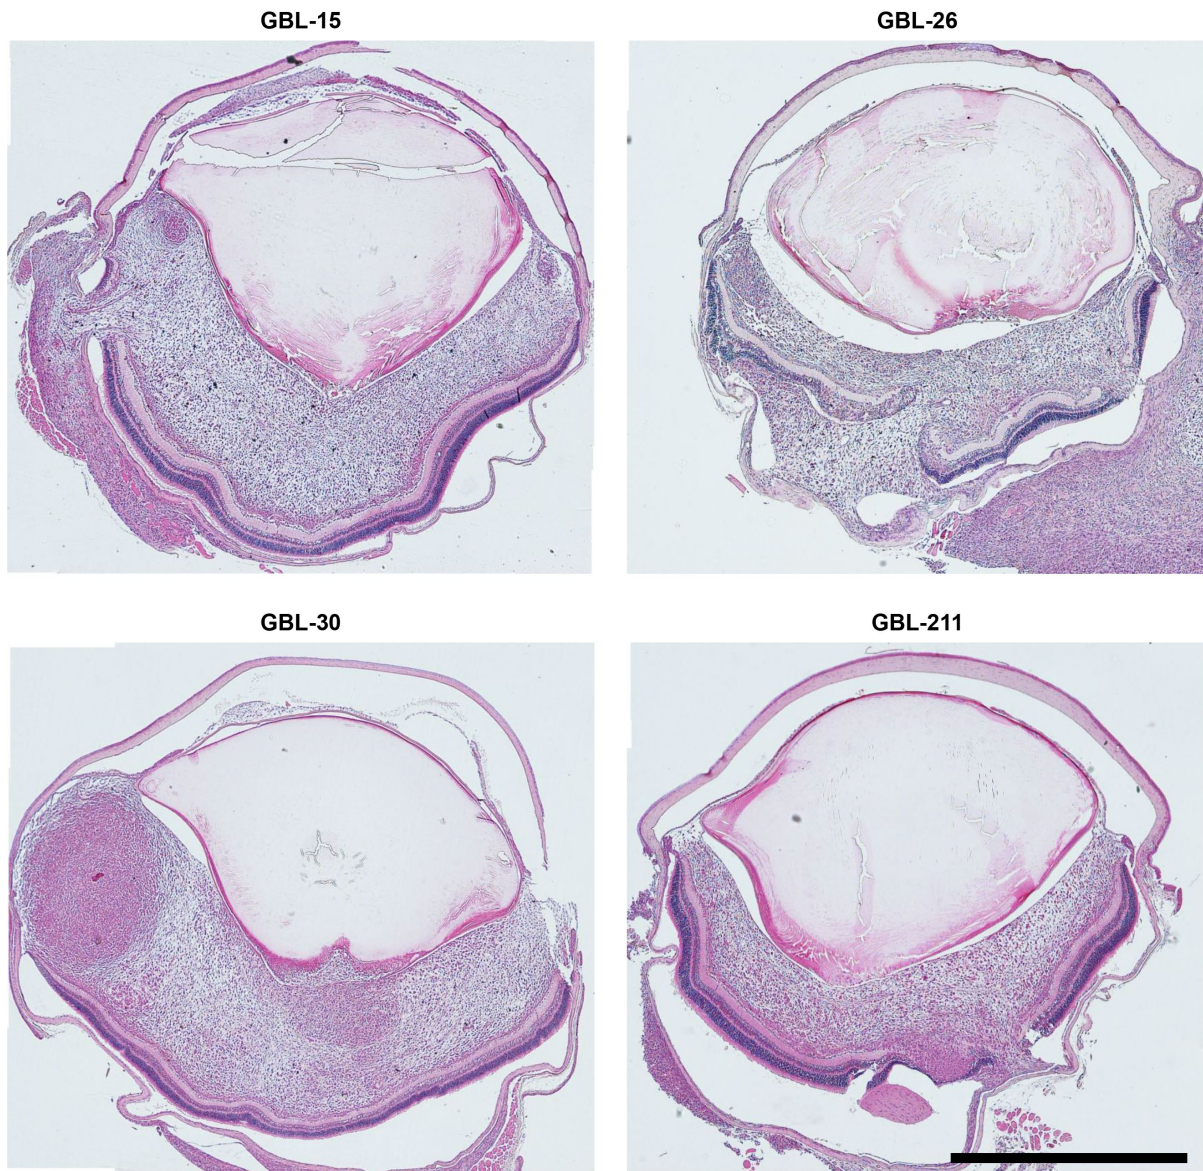

Representative photographs of H&E section of the eyeballs at 4 weeks after intravitreal injection of GBL-15, GBL-26, GBL-30, and GBL-211 which underwent hypoxia treatment for 4 hours before injection. Scale bar: 1 mm.

**Supplementary Figure 3.**

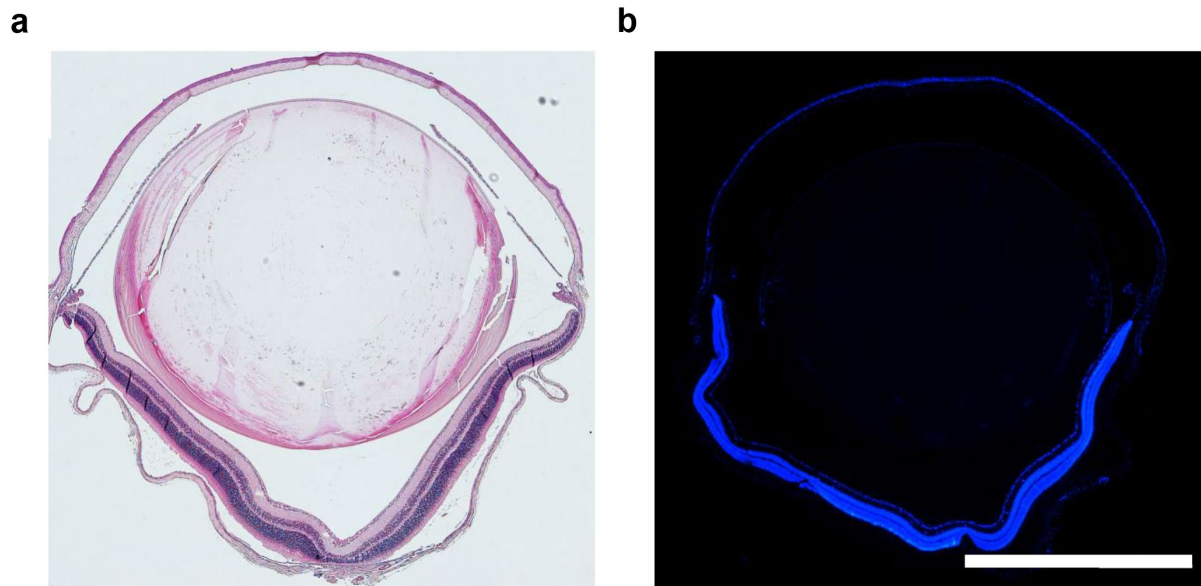

Representative photographs of H&E and immunofluorescent images of the control eyeballs of Balb/c nude mice. (a) A representative photograph of H&E sections of the control eyeballs of Balb/c nude mice. (b) A representative photograph of immunofluorescent images of the sections of the control eyeballs of Balb/c nude mice after staining with DAPI (blue) and antibodies to nestin (green) and vimentin (red). Scale bar: 1 mm.

**Supplementary Figure 4.**

**OLIG2/DAPI**

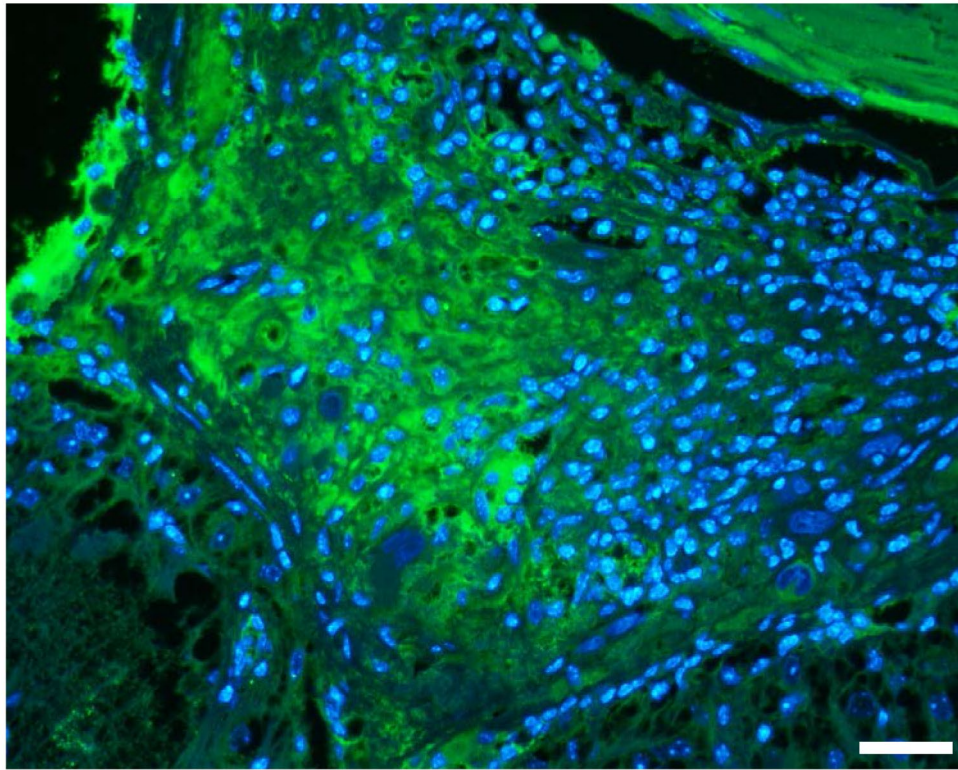

OLIG2-immunopositivity of PDX tumors in the vitreous cavity of mice. Representative magnified photographs of eyeball sections which were stained using antibodies against an antibody against human OLIG2. Scale bar: 10  $\mu$ m

Supplementary Figure 5.

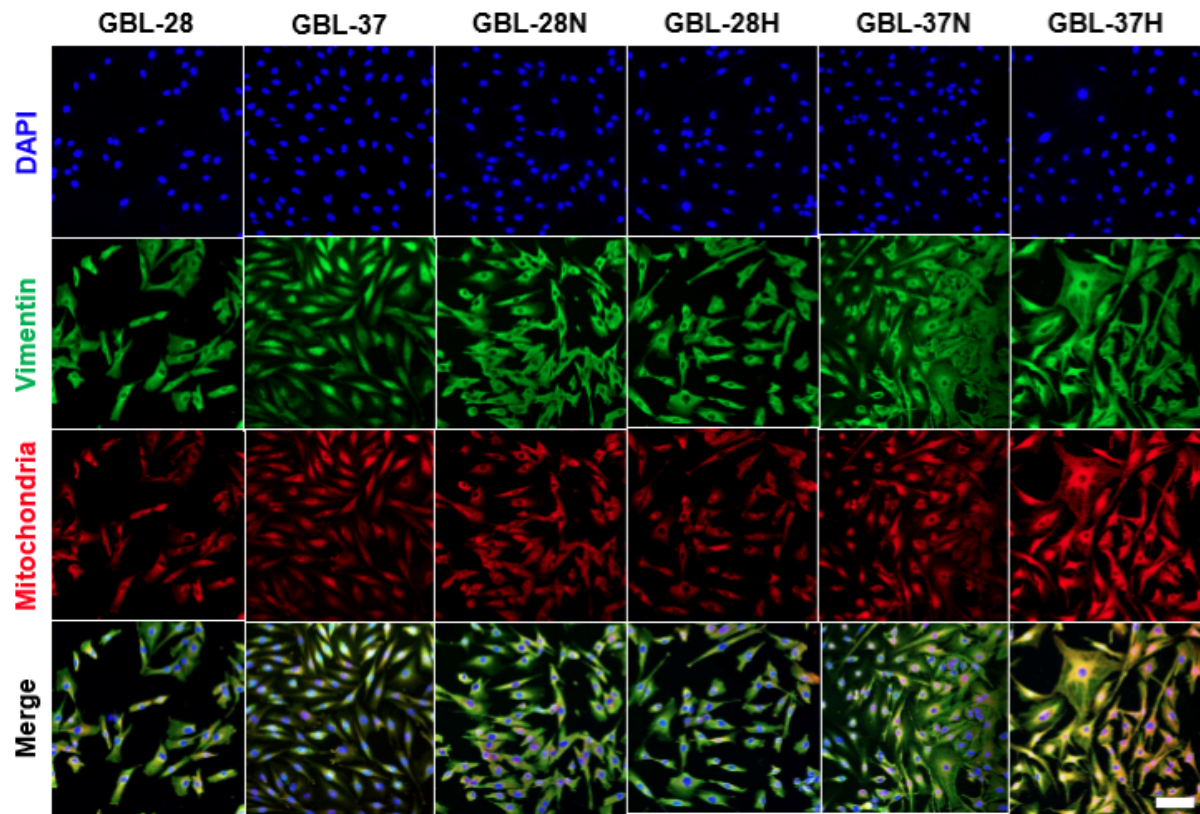

Vimentin-immunopositivity of tumor cells isolated from the vitreous cavity of mice. GBL-28N and GBL-37N, isolated from mice at 4 weeks after intravitreal injection of GBL-28 and GBL-37 cells which underwent normal culture condition. GBL-28H and GBL-37H, isolated from mice at 4 weeks after intravitreal injection of GBL-28 and GBL-37 cells which underwent hypoxia treatment for 4 hours before injection. Scale bar: 100  $\mu$ m

Supplementary Figure 6.

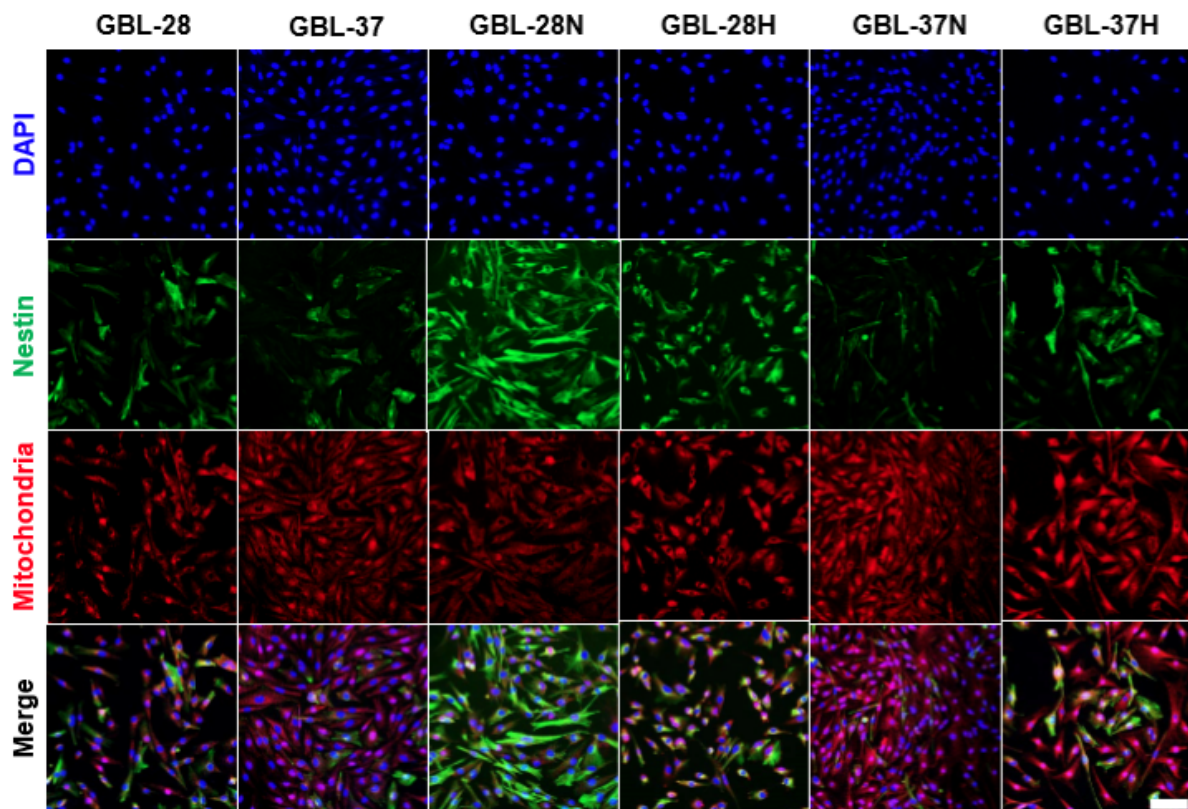

Nestin-immunopositivity of tumor cells isolated from the vitreous cavity of mice. GBL-28N and GBL-37N, isolated from mice at 4 weeks after intravitreal injection of GBL-28 and GBL-37 cells which underwent normal culture condition. GBL-28H and GBL-37H, isolated from mice at 4 weeks after intravitreal injection of GBL-28 and GBL-37 cells which underwent hypoxia treatment for 4 hours before injection. Scale bar: 100  $\mu$ m

**Supplementary Table 1.** Demographic features of patients from whom additional glioblastoma tumors were obtained.

| Features         | GBL-15 | GBL-26 | GBL-30 | GBL-211 |
|------------------|--------|--------|--------|---------|
| Age at diagnosis | 37     | 28     | 46     | 74      |
| Sex              | Female | Male   | Female | Female  |

**Supplemental Table 2.** Histological and immunohistochemical characteristics of additional glioblastoma tumors.

| Characteristics                  | GBL-15    | GBL-26   | GBL-30    | GBL-211  |
|----------------------------------|-----------|----------|-----------|----------|
| WHO grade                        | IV/IV     | IV/IV    | IV/IV     | IV/IV    |
| Increased cellularity            | Present   | Marked   | Present   | Present  |
| Nuclear polymorphism             | Present   | Marked   | Present   | Present  |
| Mitosis (pHH3)                   | 25/10 HPF | 9/10 HPF | 35/10 HPF | 6/10 HPF |
| Vascular endothelial hyperplasia | Present   | Present  | Present   | Present  |
| Necrosis                         | Present   | Present  | Present   | Present  |

HPF, high-power field; pHH3, phosphohistone H3.
